# Supplementary material for: Temperature rise of LaNi5-based alloys by hydrogen adsorption
Source: Royal Society of Chemistry journal article supplement (doi:10.1039/d1cc02358f), 2021-01-01
Supplement: d1cc02358f1.pdf [file d1cc02358f1.pdf]

Electronic supplementary information (ESI)

## **Temperature rise of LaNi<sub>5</sub>-based alloys by hydrogen absorption**

Nanxu Zhou<sup>a</sup>, Masakuni Yamaguchi<sup>b</sup>, Hiroki Miyaoka<sup>b</sup> and Yoshitsugu Kojima<sup>\*b</sup>

<sup>a</sup> *Graduate School of Advanced Sciences of Matter, Hiroshima University, 1-3-1, Kagamiyama, Higashi-Hiroshima, Hiroshima 739-8530, Japan*

<sup>b</sup> *Natural Science Center for Basic Research and Development, Hiroshima University, 1-3-1, Kagamiyama, Higashi-Hiroshima, Hiroshima 739-8530, Japan*

**\* Corresponding author. Tel.: +81 82 424 3904; fax: +81 82 424 5744.**

***E-mail address: kojimay@hiroshima-u.ac.jp (Y. Kojima).***

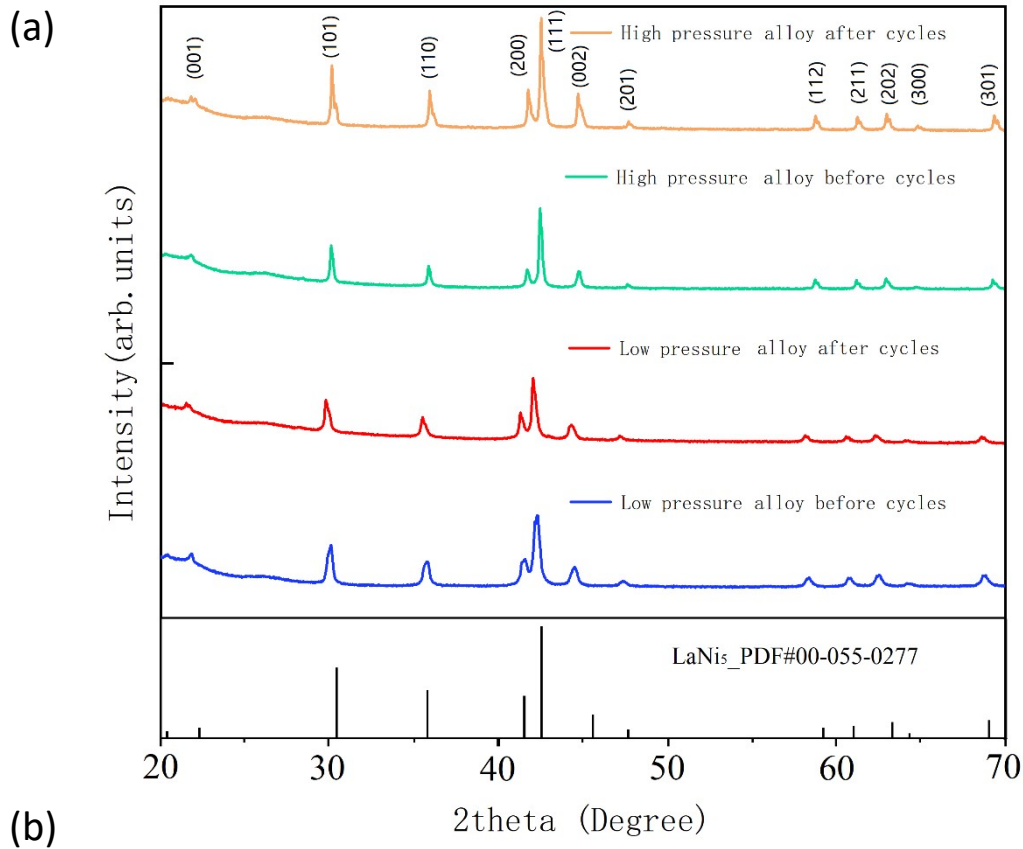

**Fig. S1** (a) XRD patterns before and after hydrogen storage cycles of the AB<sub>5</sub>-type alloys as purchased, which is La<sub>0.803</sub>Ce<sub>0.140</sub>Pr<sub>0.0148</sub>Nd<sub>0.0427</sub>Ni<sub>3.99</sub>Co<sub>0.61</sub>Mn<sub>0.30</sub>Al<sub>0.27</sub> ( referred as low-pressure AB<sub>5</sub> alloy ), La<sub>0.241</sub>Ce<sub>0.543</sub>Pr<sub>0.0538</sub>Nd<sub>0.163</sub>Ni<sub>3.986</sub>Co<sub>0.601</sub>Mn<sub>0.360</sub>Al<sub>0.053</sub> ( referred as high-pressure AB<sub>5</sub> alloy ) together with the data of LaNi<sub>5</sub> (JCPDS file No. 00-055-0277). XRD indicates that low-pressure AB<sub>5</sub> alloy and high-pressure AB<sub>5</sub> alloy have hexagonal CaCu<sub>5</sub>-type crystal structure, and the crystal structures will not change due to hydrogen storage. (b) The lattice constants and cell volume of the presented alloys, the lattice experienced an expansion after cycles

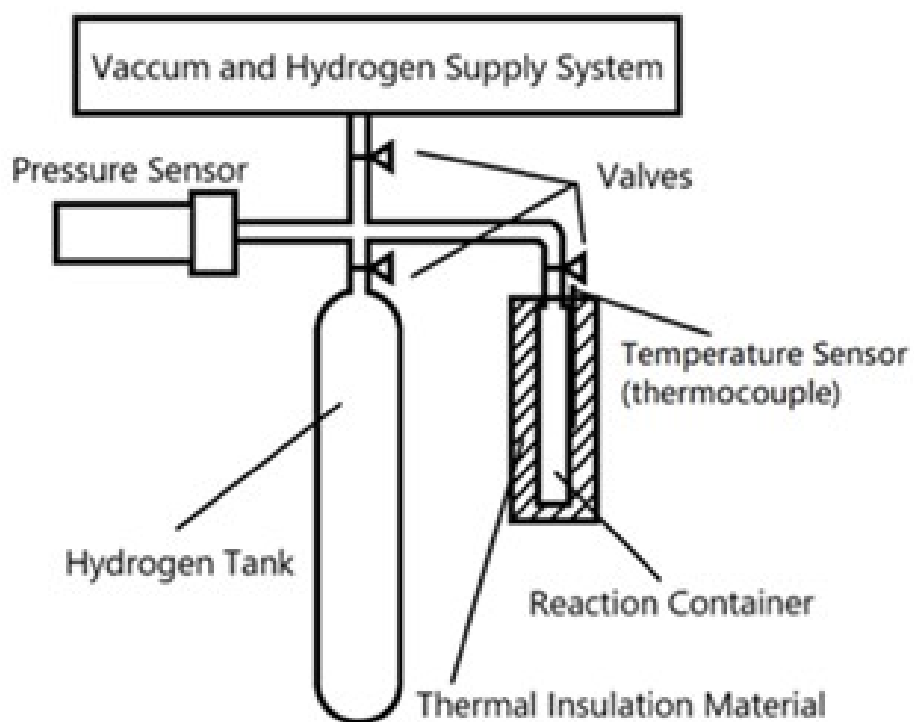

**Fig. S2** Conceptive picture of specially designed heat generation rate measurement apparatus. A thermocouple was attached on the surface of the vessel to record the surface temperature. A big hydrogen tank was used to maintain sufficient operating pressure.

| <i>Materials</i>                                                                                                                              | <i>Data source</i>                  |
|-----------------------------------------------------------------------------------------------------------------------------------------------|-------------------------------------|
| H <sub>2</sub> , CH <sub>4</sub> , NH <sub>3</sub> , water, C <sub>2</sub> H <sub>5</sub> OH,<br>Methylcyclohexane, Toluene, CCl <sub>4</sub> | NIST chemistry webbook <sup>1</sup> |
| N-Octane, Benzene                                                                                                                             | Literature <sup>2</sup>             |
| NbH <sub>2</sub> , PdH <sub>0.7</sub> , LaNi <sub>5</sub>                                                                                     | Literature <sup>3</sup>             |
| MgH <sub>2</sub>                                                                                                                              | Literature <sup>4</sup>             |
| LiH                                                                                                                                           | Literature <sup>5</sup>             |
| Low-pressure AB <sub>5</sub> alloy,<br>high-pressure AB <sub>5</sub> alloy                                                                    | By authors                          |
| LaNi <sub>4.8</sub> Sn <sub>0.2</sub>                                                                                                         | Literature <sup>6</sup>             |

**Fig. S3** Table of the data source in Fig.5 and Fig.6

## References

- 1 J. S. C. William E. Acree, Jr., in *NIST Chemistry WebBook, NIST Standard Reference Database Number 69*, Eds. P.J. Linstrom and W.G. Mallard, National Institute of Standards and Technology, Gaithersburg MD, 20899, 2021.
- 2 S. T. BOWDEN, *Nature*, 1954, **174**, 613–614.
- 3 T. Schober and H. Wenzl, *Hydrogen in metals II*, 1978.
- 4 A. San-Martin and F. D. Manchester, *J. Phase Equilibria*, 1987, **8**, 431–437.
- 5 E. Veleckis, E. H. Van Deventer and M. Blander, 1974, **78**, 1933–1940.
- 6 S. Luo, W. Luo, J. D. Clewley, T. B. Flanagan and R. C. Bowman, *J. Alloys Compd.*, 1995, **231**, 473–478.
